# Supplementary material for: The phosphatase and tensin homolog gene inserted between NP and P gene of recombinant New castle disease virus oncolytic effect test to glioblastoma cell and xenograft mouse model
Source: PubMed Central journal article supplement (PMC8800283; doi:10.1186/s12985-022-01746-w), 2022-01-29
Supplement: 12985_2022_1746_MOESM1_ESM.pdf [file 12985_2022_1746_MOESM1_ESM.pdf]

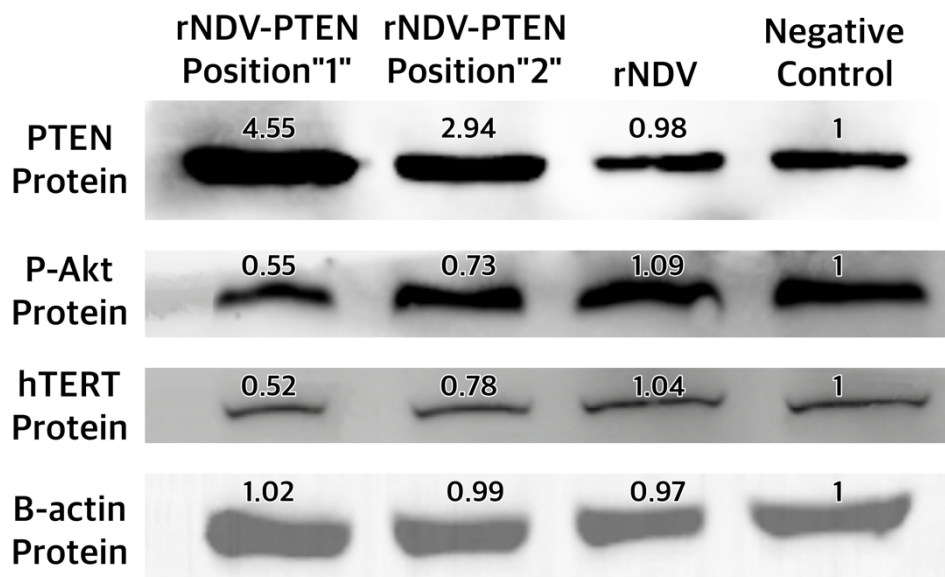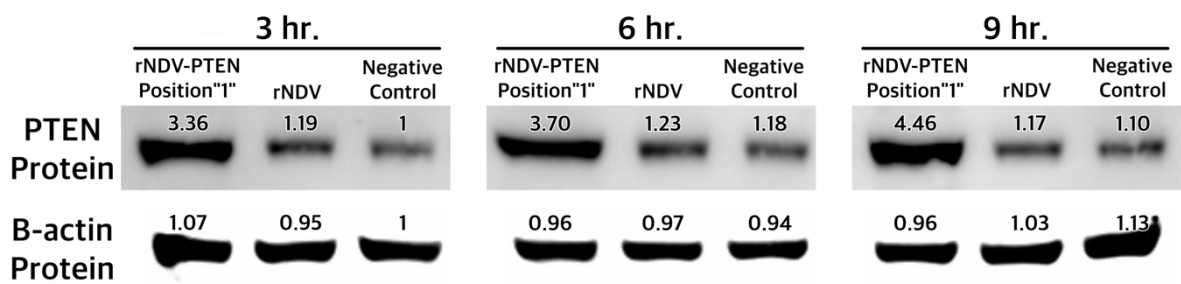

**S5. Quantification of Results of Western blotting**

**A**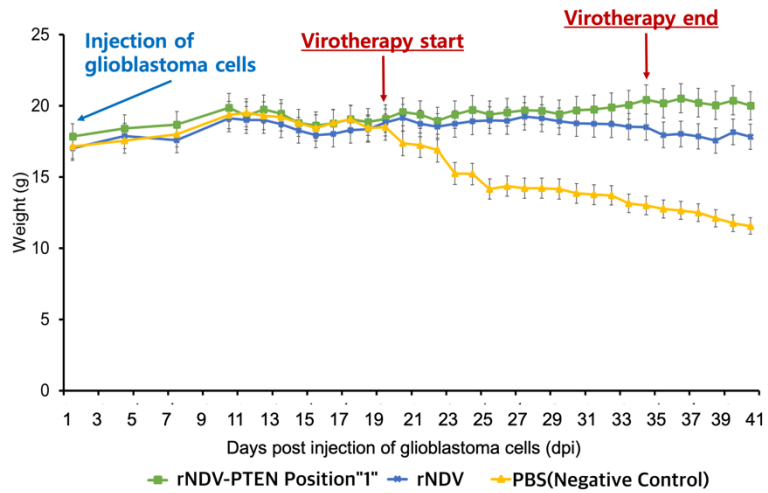**B**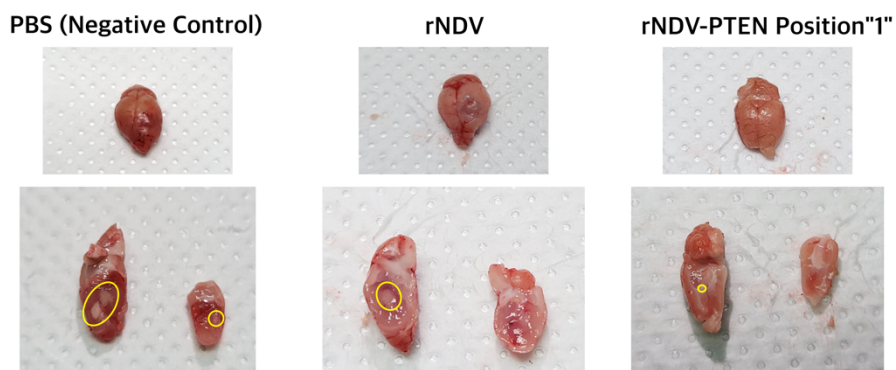

**S6. orthotropic glioblastoma model in vivo test.** A) Body weight graph of PTEN inserted rNDV Position "1", rNDV and PBS(negative control) inoculated mice. B) A cross-sectional photograph of PTEN inserted rNDV Position "1", rNDV and PBS(negative control) inoculated orthotropic glioblastoma model brain. Yellow circle indicates tumor.
